# Supplementary material for: Predicting Local Dengue Transmission in Guangzhou, China, through the Influence of Imported Cases, Mosquito Density and Climate Variability
Source: PLoS One. 2014 Jul 14;9(7):e102755. doi: 10.1371/journal.pone.0102755 (PMC4097061; doi:10.1371/journal.pone.0102755)
Supplement: Table S4 — Eigenvectors of FAC on every original variables. (XLSX) [file pone.0102755.s004.xlsx]

## Sheet: Sheet1
			Table S4. Eigenvectors of FAC on every original variables.
				FAC
				1	2	3	4
			ExMaxAP2	-0.938	0.032	0.063	0.113
			ExMinAP1	-0.734	0.531	0.079	-0.027
			ExMinAP2	-0.883	0.096	0.082	0.19
			MAP1	-0.785	0.544	0.064	-0.064
			MAP2	-0.947	0.088	0.053	0.137
			MAP3	-0.846	-0.4	-0.004	0.17
			ExMinT1	0.904	-0.35	0.014	0.037
			ExMinT2	0.957	0.157	-0.033	-0.077
			ExMaxT1	0.896	-0.367	-0.031	0.091
			ExMaxT2	0.951	0.136	-0.037	-0.102
			ExMaxT3	0.748	0.578	-0.005	-0.156
			MinT1	0.886	-0.406	-0.006	0.089
			MinT2	0.963	0.108	-0.032	-0.085
			MinT3	0.759	0.587	0.008	-0.147
			MaxT1	0.918	-0.306	0.004	0.103
			MaxT2	0.942	0.192	-0.076	-0.08
			MT1	0.904	-0.363	-0.003	0.093
			MT2	0.957	0.148	-0.049	-0.083
			AP3	0.666	0.143	0.643	0.203
			AP4	0.53	0.518	-0.324	0.519
			MaxDP3	0.592	0.198	0.701	0.255
			MaxDP4	0.445	0.532	-0.347	0.591
			MVP1	0.836	-0.503	-0.04	0.1
			MVP2	0.976	-0.024	-0.029	-0.104
			MVP3	0.839	0.485	0.044	-0.126
			MinRH2	0.731	-0.051	-0.11	-0.195
			BI0	0.598	-0.594	0.046	0.163
			BI1	0.807	-0.187	0.007	0.075
			BI2	0.79	0.271	0.082	0.02
			BI3	0.586	0.598	0.021	0.019
